# Supplementary material
Source: publisher figshare collection journal article supplement (https://gsapubs.figshare.com/articles/dataset/_/17207531)
Supplement: Supplementary file 1 [file 1]

## Sheet: Perez-Consuegra et al 2021 - Su
Sample	Unit	Lithology	Elevation	Latitude	Longitude	ZFTAge	ZFTAge_error	AFTAge	AFTAge_error	Apatite_MTL	Apatite_MTL_error	ZHeAge	ZHeAge_error	AHeAge	AHeAge_error	Reference
DV53	Antioquia Batholith	Diorite	1958	6.31075	-75.5045			72.9	18.8	13.43	0.32			13.4	1.4	Villagomez and Spikings 2013
DV54	Antioquia Batholith	Diorite	1958	6.32808	-75.4804			74.4	10.6	15.05	0.12					Villagomez and Spikings 2013
DV56	Antioquia Batholith	Granite	2192	6.0555	-75.2119	65.5	6					40.2	2.6			Villagomez and Spikings 2013
DV58	Antioquia Batholith	Granite	1143	6.01842	-75.1363			58.5	8					32	1.9	Villagomez and Spikings 2013
DV58	Antioquia Batholith	Granite	1143	6.01842	-75.1363							45.5	3.1			Villagomez and Spikings 2013
DV63	Antioquia Batholith	Qz-rich aplite	777	5.97833	-74.9587	74.8	7.4	64.1	9.8					20.6	1.4	Villagomez and Spikings 2013
DV64	Antioquia Batholith	Granodiorite	782	5.98236	-74.9554			59.8	10.2							Villagomez and Spikings 2013
DV65	Cajamarca Complex	Gneiss	602	5.98781	-74.9262			43.5	4.8	13.69	0.29					Villagomez and Spikings 2013
DV67	Cajamarca Complex	Mica schist	610	5.93742	-74.8608			113.4	22.8							Villagomez and Spikings 2013
DV70	Antioquia Batholith	Granodiorite	2317	6.97078	-75.4259	58.1	5.2	54.8	5.8	14.54	0.13			39.1	2.1	Villagomez and Spikings 2013
DV80	Cajamarca Complex	White mica schist	431	5.92153	-74.8358			41	6.6							Villagomez and Spikings 2013
DV148	Antioquia Batholith	Granodiorite	1473	6.42119	-75.3849	55.4	5.2	53	4.8							Villagomez and Spikings 2013
DV153	Antioquia Batholith	Granodiorite	1360	6.54022	-75.1219	66.6	8	69.7	8.6	14.42	0.16					Villagomez and Spikings 2013
DV154	Cajamarca Complex	Schist	2276	5.77856	-75.3089	53.1	5.6	56.6	7.4							Villagomez and Spikings 2013
DV155	Sonsón Batholith	Granite	2199	5.77172	-75.2925	71.4	9.8	44.3	6.2							Villagomez and Spikings 2013
DV156	Sonsón Batholith	Granite	2486	5.75397	-75.3001	47.9	5.2	48.2	4.8	14.95	0.17			30.7	1.8	Villagomez and Spikings 2013
DV161	Manizales Pluton	Granite	2735	5.02631	-75.3924	43.9	4.2									Villagomez and Spikings 2013
DV163	Hatillo Pluton	Granite	1100	5.17878	-74.9782	55.3	5.4	39.6	7							Villagomez and Spikings 2013
SR-26	Antioquia Batholith	Granite	2350	6.38	-75.59									46.7	2.3	Restrepo et al. 2009
SR-31	Antioquia Batholith	Granite	2170	6.37	-75.59									42.9	2.1	Restrepo et al. 2009
SR-32	Antioquia Batholith	Granite	2110	6.38	-75.6									41.3	2.1	Restrepo et al. 2009
SR-45	Antioquia Batholith	Granite	2015	6.36	-75.59									45.7	2.3	Restrepo et al. 2009
SR-46	Antioquia Batholith	Granite	1900	6.36	-75.59									40.8	2	Restrepo et al. 2009
SR-48	Antioquia Batholith	Granite	1710	6.35	-75.58									32.2	1.6	Restrepo et al. 2009
SR-44	Antioquia Batholith	Granite	1640	6.34	-75.58									26.6	1.3	Restrepo et al. 2009
SR-9	Antioquia Batholith	Granite	2370	6.46	-75.37									43.6	2.2	Restrepo et al. 2009
SR-11	Antioquia Batholith	Granite	2230	6.46	-75.37									43.4	2.2	Restrepo et al. 2009
SR-15	Antioquia Batholith	Granite	2100	6.45	-75.37									48.9	2.4	Restrepo et al. 2009
SR-19	Antioquia Batholith	Granite	1990	6.45	-75.36									40.7	2	Restrepo et al. 2009
SR-6	Antioquia Batholith	Granite	1710	6.43	-75.37									33.7	1.7	Restrepo et al. 2009
SR-2	Antioquia Batholith	Granite	1520	6.47	-75.38									36.6	1.8	Restrepo et al. 2009
SR-40	Antioquia Batholith	Granite	1500	6.41	-74.44									31.4	1.6	Restrepo et al. 2009
SR-41	Antioquia Batholith	Granite	1380	6.41	-75.41									25.1	1.3	Restrepo et al. 2009
SR-CC3	Antioquia Batholith	Granite	1070	6.76	-75.12									24.2	1.2	Restrepo et al. 2009
SR-CC2	Antioquia Batholith	Granite	1000	6.8	-75.14									23.9	1.2	Restrepo et al. 2009
SR-CC1	Antioquia Batholith	Granite	760	6.86	-75.18									22.8	1.1	Restrepo et al. 2009
GET-PV-038	Antioquia Batholith	Granite	2108	6.8999	-75.6629									39.9	1.5	Noriega-Londoño et al. 2020
GET-PV-042	Antioquia Batholith	Granite	1527	6.9166	-75.6724									25	6.7	Noriega-Londoño et al. 2020
GET-PV-047	Cajamarca Complex	Schist	788	7.01	-75.6496									42.3	3.1	Noriega-Londoño et al. 2020
AB-1	Antioquian batholith		1025	6.53778	-75.0786			42.3	1.2							Saenz (2003) MSc Thesis - Shimane University, Japan
AB-3	Antioquian batholith		870	6.51333	-74.9133			38.1	1.7							Saenz (2003) MSc Thesis - Shimane University, Japan
AB-4	Antioquian batholith		1850	6.66611	-75.2253			28.7	1.5							Saenz (2003) MSc Thesis - Shimane University, Japan
AB-5	Antioquian batholith		1280	6.45833	-75.305			46.6	1.5							Saenz (2003) MSc Thesis - Shimane University, Japan
AB-6	Antioquian batholith		2100	6.97667	-75.4369			49.1	1.2							Saenz (2003) MSc Thesis - Shimane University, Japan
AB-7	Antioquian batholith		1027	6.80139	-75.2208			34.1	1.1							Saenz (2003) MSc Thesis - Shimane University, Japan
AB-8	Antioquian batholith		2650	6.73722	-75.5986			46.1	2.0							Saenz (2003) MSc Thesis - Shimane University, Japan
AB-9	Antioquian batholith		1500	6.41111	-75.4111			38	1.1							Saenz (2003) MSc Thesis - Shimane University, Japan
AB-10	Antioquian batholith		1050	6.61889	-75.1567			43	1.9							Saenz (2003) MSc Thesis - Shimane University, Japan
AB-12	Antioquian batholith		1950	6.22528	-75.15			35.1	1.8							Saenz (2003) MSc Thesis - Shimane University, Japan
AB-13	Antioquian batholith		2200	6.51472	-75.4147			44.9	1.2							Saenz (2003) MSc Thesis - Shimane University, Japan
AB-14	Antioquian batholith		1900	6.50167	-75.2264			39	1.0							Saenz (2003) MSc Thesis - Shimane University, Japan
SB-1	Sonsón Batholith		2250	5.76944	-75.3014			39.5	1.4							Saenz (2003) MSc Thesis - Shimane University, Japan
AS-1	Amagá Stock		1670	6.04833	-75.6792			40.3	1.4							Saenz (2003) MSc Thesis - Shimane University, Japan
OS-1	Ovejas Stock		2450	6.36556	-75.6044			48.5	2.6							Saenz (2003) MSc Thesis - Shimane University, Japan
TDM-4	Sucre Monzogranite	Monzogranite	644	6.593	-75.779			23.8	9							Duque et al. (2021) JSAES
TDM-6	Sucre Monzogranite	Diorite	588	6.597	-75.783			20.6	8.2							Duque et al. (2021) JSAES
TDM-9	Ovejas Batholith	Tonalite	2402	6.331	-75.598			53.1	13.6							Duque et al. (2021) JSAES
TDM-16	Santa Fe Batholith	Diorite	653	6.596	-75.835			52.8	14.4							Duque et al. (2021) JSAES
TDM-20	Sabanalarga Batholith	Diorite	1133	6.76	-75.817			40.8	7.4							Duque et al. (2021) JSAES
TDM-21	Sabanalarga Batholith	Diorite	917	6.84	-75.804			24	7.4							Duque et al. (2021) JSAES
TDM-22	Sabanalarga Batholith	Diorite	1337	6.84	-75.802			41.6	7.6							Duque et al. (2021) JSAES
S8	Amagá Stock	Granodiorite	1798	6.036	-75.677			41.1	14.2							Duque et al. (2021) JSAES
